1 **An App-Based Ecological Momentary Assessment of**  
2 **Undergraduate Mental Health During the COVID-19 pandemic in**  
3 **Canada (Smart Healthy Campus Version 2.0): Longitudinal Study**

4

5

6

7

8

9 Chris Brogly <sup>1,2</sup>; Daniel J Lizotte <sup>3,4</sup>; Marc Mitchell <sup>5</sup>; Mark Speechley <sup>4</sup>; Arlene  
10 MacDougall <sup>4,6</sup>; Erin Huner <sup>7</sup>; Kelly K Anderson <sup>4,6</sup>; Michael A Bauer <sup>3</sup>

11

12

13 <sup>1</sup> Faculty of Information and Media Studies , Western University , London , ON , CA

14 <sup>2</sup> Faculty of Health Sciences , Western University , London , ON , CA

15 <sup>3</sup> Department of Computer Science , Western University , London , ON , CA

16 <sup>4</sup> Department of Epidemiology and Biostatistics , Schulich School of Medicine and  
17 Dentistry , Western University , London , ON , CA

18 <sup>5</sup> School of Kinesiology , Faculty of Health Sciences , Western University , London , ON , CA

19 <sup>6</sup> Department of Psychiatry , Schulich School of Medicine and Dentistry , Western  
20 University , London , ON , CA

21 <sup>7</sup> Ivey Business School , Western University , London , ON , CA

22

## 23 Abstract

24 This paper presents results from the Smart Healthy Campus 2.0 study/smartphone  
25 app, developed and used to collect mental health-related lifestyle data from 86  
26 Canadian undergraduates January – August 2021. This was a longitudinal repeat  
27 measures study conducted over 40 weeks. A 9-item mental health questionnaire  
28 was accessible once daily in the app. Two variants of this mental health  
29 questionnaire existed; the first was a weekly variant, available each Monday or until  
30 a participant responded during the week. The second was a daily variant available  
31 after the weekly variant. Mixed models were fit for responses to the two variants  
32 and 12 phone digital measures (e.g. GPS, step counts). A second round of models  
33 was fit based on backward elimination to determine associations between the 12  
34 digital measures and the variants. 6518 digital measure samples and 1722  
35 questionnaire responses were collected. The daily questionnaire had positive  
36 associations with floors walked, installed apps, and campus proximity, while having  
37 negative associations with uptime, and daily calendar events. Daily depression had a  
38 positive association with uptime. Daily resilience appeared to have a slight positive  
39 association with campus proximity. The weekly questionnaire variant had positive  
40 associations with device idling and installed apps, and negative associations with  
41 floors walked, calendar events, and campus proximity. Physical activity, weekly, had  
42 a negative association with uptime, and a positive association with calendar events  
43 and device idling. SHC 2.0, via phone digital measures, identified indicators of  
44 lifestyle that appeared to be associated with measures of mental health in  
45 undergraduates during COVID-19.

## 46 **Author Summary**

47 This paper analyzes the associations between digital measures from smartphones  
48 (such as GPS and step counts) and a broad mental health questionnaire (covering  
49 items like depression and anxiety). This data was collected from students at a  
50 relatively large, urban university in Canada during the COVID-19 pandemic. We  
51 conducted this study because smartphone-based studies observing aspects of  
52 mental health in students as they go about their daily lives are uncommon in  
53 Canada. Additionally, mental health concerns, such as depression and anxiety, can  
54 be common on university campuses, although it isn't always clear what is associated  
55 with those concerns, especially when only looking at them with smartphone data.  
56 We were also interested in how an overview of student mental health would relate  
57 to digital measures coming from smartphones during the pandemic, as this  
58 information would be relevant to inform future pandemics. In general, these  
59 relationships might potentially inform ways to improve student mental health, or  
60 potentially predict aspects of it, based on data coming in from smartphones.

## 61 **Introduction**

62 Mental health issues on university campuses are common during periods of  
63 traditional in-person study <sup>1</sup>. Universities in Canada <sup>2</sup> have recognized that  
64 undergraduate students are faced with a number of stresses that challenge mental  
65 health. Undergraduate studies are demanding, and students often feel overwhelmed  
66 by their obligations <sup>1</sup>. Additionally, the COVID-19 pandemic had an unprecedented  
67 effect on post-secondary students all over Canada, who experienced disruptive <sup>3-7</sup>  
68 changes to their studies in response to necessary public health measures regarding

69 COVID-19. Canadian undergraduates have been surveyed regarding aspects of  
70 mental health using traditional sampling techniques such as questionnaires and  
71 interviews on several occasions<sup>8-10</sup>. Another sampling technique particularly useful  
72 to this area is the Ecological Momentary Assessment (EMA) which allows for  
73 students to be sampled regarding aspects of their mental health as they go about  
74 their days; EMA studies are generally facilitated via mobile apps that run on Android  
75 and iOS. In addition to questionnaire responses, the apps can collect a wealth of data  
76 related to mental health from device hardware, such as GPS location, step counts,  
77 and indicators of life activity. For instance, the StudentLife study from Dartmouth  
78 College was one of the first in this area to assess student mental health using an app  
79 <sup>11</sup>,

80

81 We were interested in studying aspects of student mental health in general via  
82 mobile apps as, to the best of the author's knowledge, little work has been done in  
83 this area at Canadian universities. We also had a particular interest in how mental  
84 health measures might be associated with various digital measures coming from  
85 smartphone hardware. As a result, we developed and launched the Smart Healthy  
86 Campus 2.0 app on Android and iOS. This ran on a research platform we called  
87 EMAX, which has been outlined in a previous paper<sup>12</sup>. SHC 2.0 is the successor to a  
88 limited, pilot SHC 1.0 study, also detailed in a previous paper<sup>13</sup>. The SHC 2.0 app  
89 asks a small number of mental health-related questions on a daily basis and collects  
90 data from phone hardware as questionnaires are submitted and also occasionally in  
91 the background. It was designed to be run during traditional on-campus study for an

92 extended period, such as several months or even semesters. However, the SHC 2.0  
93 study ended up being launched and run during a significant portion of the COVID-19  
94 pandemic, as it was still relevant. We also launched a separate, strongly-pandemic  
95 focused study/app called Student Pandemic Experience (SPE) <sup>14</sup>, which collected  
96 more data than the SHC 2.0 study, but was not suitable for use past the pandemic  
97 due to the specialized questionnaires used. For SHC 2.0, objectives of the study were  
98 to 1) address the lack of longitudinal data in Canada on overviews of student mental  
99 health and any potentially related measures of lifestyle, and 2) to identify  
100 associations between these self-reported overviews of mental health (from  
101 questionnaires) and lifestyle-related measures (from smartphone digital measures).  
102 In this study, we focused on providing a more complete analysis of any and all  
103 device digital measures that might relate to student mental health rather than  
104 focusing heavily on specific ones. Available smartphone digital measures (such as  
105 GPS, step counts) were still categorized into related groups, informed by previous  
106 work in mobile sensing<sup>15</sup>, including 1) Movement and physical activity, 2) Device  
107 usage, and 3) Social and life activity indicators. As this was exploratory  
108 observational research, we did not make specific hypotheses about how these  
109 various phone sensors might explain aspects of participant mental health – we were  
110 only interested in the prospect of whether any associations between the two might  
111 exist. We consequently decided not to elaborate on the meaning or function of any  
112 associations.

113

114 Figure 1. Image of the Smart Healthy Campus 2.0 app during a questionnaire.

115

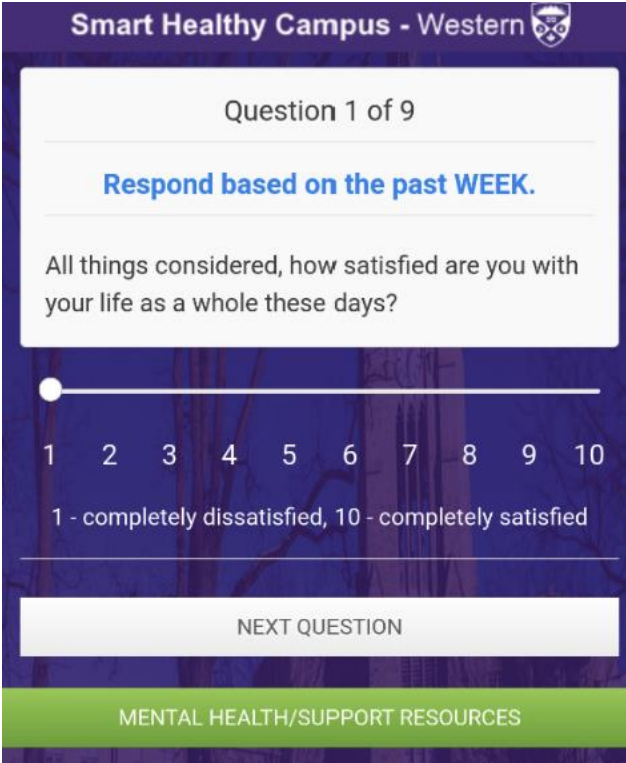

The screenshot shows a survey interface for 'Smart Healthy Campus - Western'. The question is 'Question 1 of 9' and asks the user to 'Respond based on the past WEEK.' The question text is: 'All things considered, how satisfied are you with your life as a whole these days?'. Below the question is a horizontal slider with a white dot at the far left, indicating a rating of 1. The slider is marked with numbers 1 through 10. Below the slider, it says '1 - completely dissatisfied, 10 - completely satisfied'. At the bottom of the question card is a 'NEXT QUESTION' button. Below the question card is a green bar with the text 'MENTAL HEALTH/SUPPORT RESOURCES'.

116

## 117 **Methods**

### 118 **Recruitment**

119 Mass email recruitment was conducted. All Western University undergraduate  
120 students were invited over email to download the SHC 2.0 app in January 2021 and  
121 in March 2021 in order to participate in the study. The app was available on Google  
122 Play (Android) and the Apple App store. Sign-up information, including  
123 demographic information, was collected entirely in the app. To sign up for the SHC  
124 2.0 app, participants had to view and accept the terms of the letter of information. At  
125 sign-up, they were also allowed to consent to providing their Twitter username (for  
126 tweet analysis) and to linking their SHC 2.0 app data with health records and

127 psychological services records from campus health services. However, due to low  
128 consent rates, these sources of additional data were not used for SHC 2.0. 94  
129 participants signed up for the app, and 86 participants both signed up and did at  
130 least one questionnaire in the app.

### 131 **Inclusion and Exclusion Criteria**

132 The only inclusion criterion was that a participant was a full-time undergraduate  
133 student at Western University. Exclusion criteria were students enrolled in graduate  
134 or professional programs. Participants had to select their undergraduate program  
135 from a list in the SHC 2.0 app during the sign-up process.

### 136 **Study Design**

137 SHC 2.0 was an Ecological Momentary Assessment-type app-based longitudinal  
138 cohort study with a repeated measures design. The SHC 2.0 app collected responses  
139 to a short questionnaire with a range of data from phone hardware potentially  
140 relevant to student mental health; responses and data were sent encrypted to our  
141 server when a participant submitted a questionnaire. The SHC 2.0 app also collected  
142 this same phone data in the background automatically on an hourly basis;  
143 participants could set this collection event to 1, 2, or 3 hours. This paper reports on  
144 the first 40 weeks (out of 52 weeks) of data collected for SHC 2.0; the majority of the  
145 study data was collected during this time. Participants could download and use the  
146 SHC 2.0 app and complete surveys as often or as little as they wanted, as there were  
147 no specific requirements on participation. As a result, compliance rates and  
148 missingness vary widely each day/week.

149 **Participant Compensation**

150 The SHC 2.0 app included a points-based incentive system. Participants could  
151 accumulate points through app use and redeem 30000 points for a \$5 Amazon gift  
152 card. Rewards were offered as the study progressed, and there were no limits on the  
153 total amount of gift cards redeemed. The first survey of the week, the weekly survey,  
154 would yield 3000 points. Daily surveys would provide 500 points, and background  
155 data collection events would provide 100. These point values were selected to  
156 prevent too much incentivization during a single week. Figure 2 shows an example  
157 of using the incentive system. It also allowed for the potential to add new rewards as  
158 the study progressed, although only the \$5 Amazon gift cards were used during the  
159 study.

160

161 Figure 2. SHC 2.0 point-based incentive system screen (left image). The app has to  
162 be scrolled to see the entire screen (right image).

163



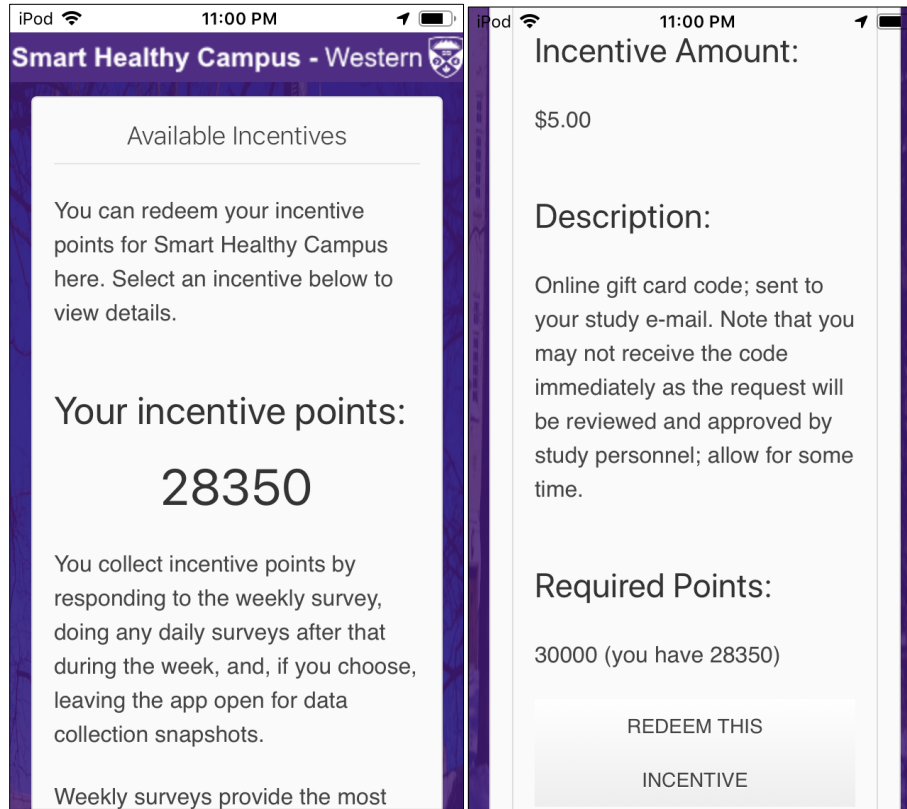

164

165 **Measures – Smart Healthy Campus 2.0 Questionnaire – Details**

166 The SHC 2.0 app always makes a 9-item questionnaire available once per day.  
167 However, there are two variants to this questionnaire; the first is the weekly variant,  
168 which available during a new week starting Monday. The weekly variant was  
169 designed to capture the experience of the entire past week in case participants were  
170 infrequent responders. It would remain open as the first questionnaire to be  
171 completed for that week. As an example, if a participant waited until Friday or even  
172 Saturday or Sunday to provide a questionnaire response, the weekly variant would  
173 still be available then, since that would be the first questionnaire response of that  
174 week. If the weekly variant was completed, the daily variant was then available  
175 every day until the next Monday, including on Saturday and Sunday. These variants

176 are very similar – only 2 of the 9 questions change and the text of the questions  
177 were edited to reflect either the daily or weekly focus. If a participant did not  
178 complete at least the weekly variant, then they did not provide any responses at all  
179 for that given week, although hourly background data may still have been collected  
180 by the SHC 2.0 app. Reminders to complete questionnaires were sent to participant  
181 devices via standard push notification manually by research personnel, usually at  
182 the beginning of the week, and occasionally throughout the week, but a set schedule  
183 for reminders was not followed. These notifications were generic reminders for all  
184 participants and did not change if a participant had completed a survey for that day.  
185

186 Question topics from both variants cover a range of mental health-related measures  
187 relevant to students. For instance, two questions on resilience (weekly/daily) were  
188 included. Resilience is important for mental health, and is the ability to bounce back  
189 from, and adapt to difficult situations <sup>16</sup>. One question on community connectedness  
190 was included (weekly/daily) and was of general interest to this study during typical  
191 in-person undergraduate studies, but the shift to online learning during the  
192 pandemic likely resulted in this having different but potentially interesting  
193 connotations.

#### 194 **Measures – Smart Healthy Campus 2.0 Questionnaire, Weekly Variant**

195 The weekly variant is almost the same as our pilot SHC 1.0 study questionnaire  
196 (which was also distributed weekly) and this was shown in the pilot SHC 1.0 study  
197 to significantly correlate with mental health domains based on validated full-length  
198 questionnaires <sup>13</sup>. The first 7 questions are the same as the SHC 1.0 questionnaire.

199 The last two new questions were considered for but disused in the original study;  
200 these were added here to increase data collection.

201 **Measures – Smart Healthy Campus 2.0 Questionnaire, Daily Variant**

202 The daily variant was again based on the pilot SHC 1.0 questionnaire, and the  
203 content of the first 7 questions was the same, but they had more edits to clarify the  
204 questions were reflective of the day. Like the weekly variant, the last two new  
205 questions were considered for, but disused, in the initial SHC 1.0 pilot study and  
206 were again added here to increase data collection.

207 Table 1. Mental health domain coverage of the SHC 2.0 weekly and daily  
208 questionnaire variants. This table lists the domain of each of the 9 questions and its  
209 source. The two questionnaires are available in Multimedia Appendix 1.

| Weekly Variant<br>Mental Health<br>Domain | Source | Daily Variant Mental<br>Health Domain | Source |
|-------------------------------------------|--------|---------------------------------------|--------|
| Life Satisfaction                         | 17     | Life satisfaction                     | 17     |
| Psychological well-<br>being              | 18     | Psychological well-<br>being          | 18     |
| Resilience                                | 19     | Resilience                            | 19     |
| Anxiety                                   | 20     | Anxiety                               | 20     |
| Depression                                | 21     | Depression                            | 21     |
| Community<br>connectedness                | 22     | Community<br>connectedness            | 22     |

|                   |    |                        |       |
|-------------------|----|------------------------|-------|
| Physical Activity | 23 | Anxiety                | 21    |
| Anxiety           | 21 | Psychological Distress | 24,25 |
| Resilience        | 19 | Resilience             | 19    |

## 210 Digital Measures – Overview

211 From the SHC 2.0 app on the participant devices, 12 digital measures were selected  
212 for analysis in this paper (these data came almost exclusively from smartphones but  
213 tablets still were occasionally used). There were more than 12 measures collected  
214 via the SHC 2.0 app, but these 12 selected for analysis here had the greatest amount  
215 of data available across both Android and iOS platforms. A full list of digital  
216 measures that the SHC 2.0 app collected can be found in our paper on the EMAX  
217 platform which powered the SHC 2.0 app <sup>12</sup>.

218 These digital measures were collected during two types of data collection “events”:  
219 Response and Background. Response events occurred whenever a participant  
220 responded to a survey. Background events occurred as a result of ongoing data  
221 collection, which happened on a 1, 2, or 3 hour basis (approximately). Participants  
222 could use a slider in the app to choose whether background data collection should  
223 occur approximately every 1, 2, or 3 hours. For both the Response and Background  
224 events, digital measure data were uploaded to our server. The Response event,  
225 unlike the Background event, also contained the response data to a weekly survey.  
226 Since Background events did not have this data, but it was needed for mixed model  
227 fits, an algorithm was run over all the Background event data to connect it to the  
228 most recent Response questionnaire result found before the Background event  
229 occurred.

### 230 **Digital Measures - Movement and Physical Activity**

231 To determine associations between mental health questionnaire results and  
232 movement and physical activity, we examined 4 sources of data. First, we looked at  
233 total weekly step count. Step counts are commonly analyzed in mobile sensing  
234 studies<sup>26</sup>. Second, we examined GPS locations visited. We define GPS locations  
235 visited as a sum of any significant changes in geographic location. Our SHC 2.0 app  
236 only detected GPS coordinates to two decimal places, so a “significant change” of at  
237 least 0.01 in the latitude/longitude of a coordinate is required to increase this sum.  
238 Third, we define floors walked as floors gone up + floors gone down over the past  
239 week. Fourth, a location “flag” was used (called “Campus Dist.” in the results  
240 section), and it could have three values: (1) on-campus, (2) in London, Canada and  
241 (3) outside of London, Canada.

### 242 **Digital Measures - Device usage**

243 To determine associations between mental health questionnaire results and device  
244 usage, we examined 5 sources of data. First, we collected system uptime in  
245 milliseconds. We also collected system uptime (including deep sleep), in  
246 milliseconds (uptime + time the device was sleeping). Second, we obtained available  
247 RAM (available phone Random Access Memory) in bytes. Unlike CPU usage,  
248 available RAM (in bytes) is straightforward to collect across iOS/Android platforms.  
249 Third, we obtained a percentage of internal free space. Finally, we timed how long  
250 users had run the SHC 2.0 app on their device, in milliseconds.

251 **Digital Measures – Social/life activity indicators**

252 Contacts and calendars are data sources that may be indicative of social or life  
253 activity and they were straightforward to access across platforms. The sum of  
254 calendar events were collected. These events may include items like reminders for  
255 physical activity, events, and appointments. A sum of all contact counts at each  
256 sample was also obtained. Additionally, a basic algorithm to check for family-related  
257 names (or containing family-related names) in contacts was run to collect a sum of  
258 these.

259 **Digital Measures - Additional item: Number of apps installed**

260 One additional data source was included in this analysis and considered a digital  
261 measure. This was a percentage of popular installed apps from a known list of 40.  
262 However, we did not split these by category due to the small list of 40.

263 **Statistical Analysis**

264 The focus of the statistical analysis in this paper is on the relationship between  
265 phone digital measures and the SHC 2.0 questionnaire variants. The total score of  
266 the SHC 2.0 questionnaire variants are examined (some items were recoded to make  
267 them suitable for a total sum), along with scores from individual questions, which  
268 are representative of various mental health domains<sup>13</sup> (see Methods). SHC 2.0  
269 required participants to answer all questions since the questionnaires were short.  
270 R 4.1.1 “Kick Things” and RStudio were used for all statistics. All mixed linear  
271 models shown were constructed using the lmerTest library<sup>27</sup> which provides p-  
272 values for effects using the Satterthwaite degrees of freedom method<sup>27</sup>. sjPlot was

273 used for coefficient graphs and ggplot2 was used for line graphs. This approach to  
274 mixed linear models with EMA data and the same R packages were previously used  
275 by Huckins et al. <sup>28</sup> and Mack et al. <sup>29</sup> in their study on student mental health and the  
276 impact of COVID-19 at Dartmouth College.

277 With regards to building the mixed linear models, z-score standardization was used  
278 on digital measure items with R's scale(...) function as values could vary  
279 considerably. For each mental health questionnaire (DV), a first model was fit with  
280 all 12 previously discussed digital measure items as fixed-effects. The participants  
281 were the random-effect. Then, all the digital measure items that lmerTest did not  
282 report significance for were removed, and a second, final model was fit with only the  
283 significant digital measure items (backward elimination). The reason for fitting and  
284 only using a second model with backward elimination was that removing those  
285 insignificant terms sometimes greatly increased the amount of complete case digital  
286 measure samples available for use in the lmerTest models. It also removed digital  
287 measure items with weaker (although in the first model, initially significant) p-  
288 values.

### 289 *Data Inclusion*

290 Highly correlated mixed model parameters can make each other non-significant  
291 even if they are predictive. There were many significant correlations between the  
292 parameters used for these models, however, the majority were very weak or weak  
293 based on Spearman coefficients (0.0-0.20). Some coefficients did enter moderate  
294 territory in the range of 0.4 to 0.6. Additionally, there was a strong correlation  
295 between system uptime, and system uptime with deep sleep, although we argue this

296 was acceptable as those likely better highlighted differences between device use and  
297 potential idle or sleep time for participants; additionally, more than one model  
298 resulted in significance for only one of these parameters, while others produced  
299 significance for both, suggesting the correlation was not important. We argue these  
300 correlations in our 12 selected digital measure items, most of them being very weak  
301 or weak, were not detrimental to the mixed model fits as the 12 selected items were  
302 the most available across participants and platforms (iOS, Android), and thus best  
303 representative of lifestyle and behaviors during this time.  
304 Since backward elimination was applied to remove insignificant digital measure  
305 items from final models, sample sizes and the associated number of complete case  
306 digital measure sample observations used for the model fits may vary, so they are  
307 shown with the associated model in the results section.

## 308 **Results**

### 309 **Overview**

310 Our main results consist of 17 mixed linear models. Note that the mixed model  
311 “Measures” (fixed-effects) such as “RAM” or “GPS Locations Visited” are described in  
312 the “Digital Measures” sections under Methods. There are two rounds of fits for the  
313 17 mixed models. The second, revised models are based on backward elimination of  
314 the first in order to produce only the significant fixed-effects (device digital  
315 measures) that might predict scores for SHC 2.0 weekly/daily questionnaires and  
316 also for individual questions. This backward elimination process was used to  
317 increase the complete case count - samples that contained data for all 12 digital



318 measures selected. Individual questions are examined here in addition to the total  
319 questionnaire score, as on their own, they were designed to capture various  
320 domains of mental health (e.g. depression, anxiety) <sup>13</sup> (discussed in Methods). The  
321 goal of the mixed linear model analysis is that by knowing the measurable  
322 behaviors/lifestyle associated with positive mental health, it should become easier  
323 to design traditional or computer-related interventions to direct participants to  
324 those associated behaviors/lifestyle. Another goal is that these models might be  
325 integrated into future apps that directly provide interventions or predictions, that  
326 might be triggered by these models or similar ones.

327 First, the demographics of the 94 participants in SHC 2.0 are presented. Then, we  
328 present plots of selected mean scores from our SHC 2.0 weekly questionnaire with  
329 key pandemic event markers. Lastly, the results of the 17 mixed linear model fits are  
330 shown between the 12 selected phone digital measures and A) the SHC 2.0 daily  
331 questionnaire total score and individual questions, and B) the SHC 2.0 weekly  
332 questionnaire total score and individual questions. The results of the daily  
333 questionnaire model fits are presented to start as more data was collected daily.

### 334 **Demographics**

335 Table 2 below presents the demographic information of the 94 participants in SHC  
336 2.0. Participants primarily identified as male and living in off-campus housing.

337

338 Table 2. Participant demographics at baseline. As questions can be skipped,  
339 sometimes the cells for each item may not necessarily add to 100%.

|                                                      |                                          | Participants<br>(N=94) | Percent<br>% |
|------------------------------------------------------|------------------------------------------|------------------------|--------------|
| <b>What is your gender?</b>                          |                                          |                        |              |
|                                                      | Female                                   | 22                     | 23.4%        |
|                                                      | Male                                     | 72                     | 76.6%        |
| <b>What would you consider your primary faculty?</b> |                                          |                        |              |
|                                                      | Faculty of Arts                          | 14                     | 14.9         |
|                                                      | Faculty of Engineering                   | N/A                    | <= 5%        |
|                                                      | Faculty of Information and Media Studies | N/A                    | <= 5%        |
|                                                      | Faculty of Health Sciences               | 14                     | 14.9         |
|                                                      | Faculty of Music                         | N/A                    | <= 5%        |
|                                                      | Faculty of Science                       | 35                     | 37.2         |
|                                                      | Faculty of Social Science                | 25                     | 26.6         |
| <b>What degree are you completing?</b>               |                                          |                        |              |
|                                                      | BA                                       | 34                     | 36.2         |
|                                                      | BEng                                     | N/A                    | <= 5%        |
|                                                      | BHealthSci                               | 10                     | 10.6         |

|                                              |                |     |       |
|----------------------------------------------|----------------|-----|-------|
|                                              | BManagement    | 9   | 9.6   |
|                                              | BMedSci        | 16  | 17    |
|                                              | BMusic         | N/A | <= 5% |
|                                              | BSc            | 18  | 19.1  |
|                                              | BSc in Nursing | N/A | <= 5% |
| <b>What year are you currently in?</b>       |                |     |       |
|                                              | First year     | 38  | 40.4  |
|                                              | Second year    | 20  | 21.3  |
|                                              | Third year     | 19  | 20.2  |
|                                              | Fourth year    | 12  | 12.8  |
|                                              | Fifth year+    | 5   | 5.3   |
| <b>What year did you begin your studies?</b> |                |     |       |
|                                              | 2016           | 12  | 12.8  |
|                                              | 2017           | 11  | 11.7  |
|                                              | 2018           | 20  | 21.3  |
|                                              | 2019           | 18  | 19.1  |
|                                              | 2020           | 32  | 34    |
|                                              | 2021           | N/A | <= 5% |

|                                                  |                      |    |      |
|--------------------------------------------------|----------------------|----|------|
| <b>What is your current housing situation?</b>   |                      |    |      |
|                                                  | Off-campus Apartment | 10 | 10.6 |
|                                                  | Off-campus House     | 65 | 69.1 |
|                                                  | On-campus Residence  | 19 | 20.2 |
| <b>What is your current relationship status?</b> |                      |    |      |
|                                                  | In-relationship      | 42 | 44.7 |
|                                                  | Single               | 52 | 55.3 |

340

341 **Pandemic events and selected mean scores of SHC 2.0 weekly questionnaire**

342 Although SHC 2.0 was not specifically designed to run during the pandemic, it ended  
343 up being launched during COVID-19 and ran for a significant amount of time during  
344 the pandemic, as the app's data collection and questionnaire remained relevant. We  
345 provide visualizations of select mental health measures overlaid by key provincial  
346 lockdown measures in Ontario below. The mean scores of the sum of the SHC 2.0  
347 weekly questionnaire, along with means of selected individual questions from the  
348 weekly variant, are shown in Figures 3 and 4. Important dates related to the COVID-  
349 19 pandemic are shown in Table 3.

350 Figure 3. SHC 2.0 mean weekly questionnaire score over study weeks during COVID-  
351 19. The weekly score is representative of a broad overview of participant mental  
352 health (Life satisfaction, psychological well-being, resilience, anxiety, depression,  
353 and community connectedness). Higher scores are representative of a more positive  
354 mean overview (ie. better).

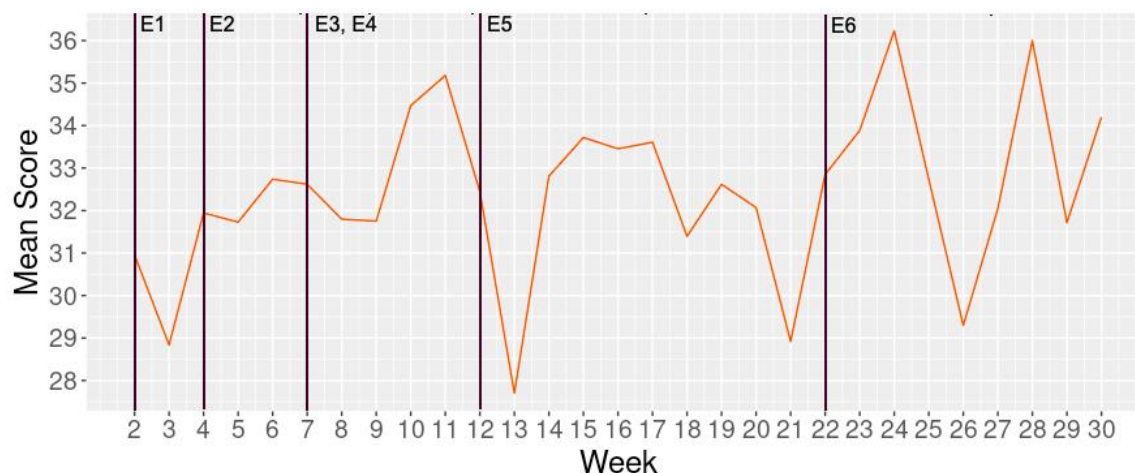

355

356

 Mean Weekly SHC 2.0 questionnaire score

357

358 Figure 4. Selected measures from SHC 2.0 over study weeks during the COVID-19

359 pandemic: community connectedness, psychological well-being, and resilience.

360 Higher scores can be considered positive (ie. better).

361

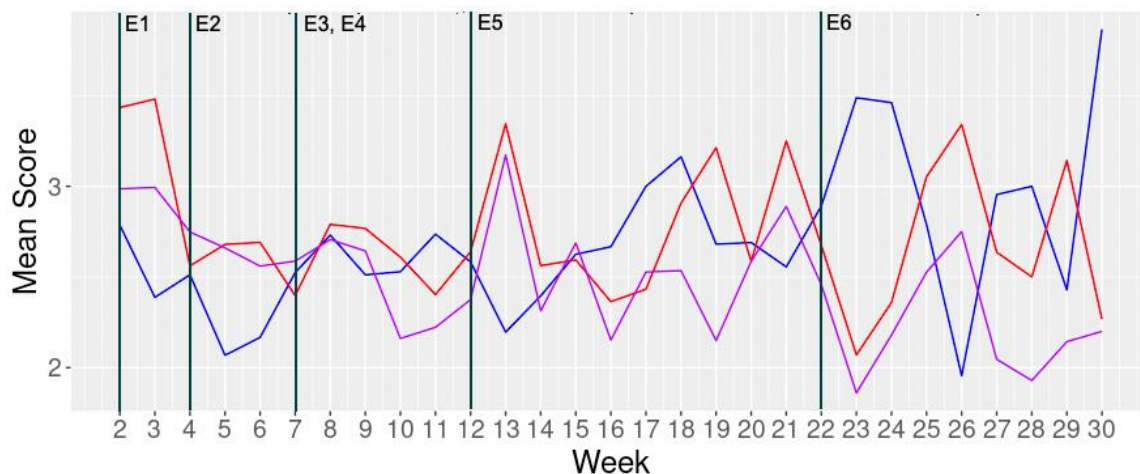

362

363

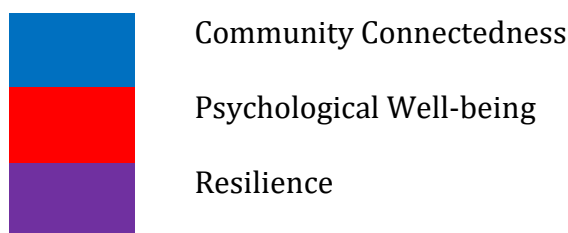

364

365 Table 3. Key events related to the SHC 2.0 study and COVID-19 during January 2021-  
 366 June 2021. These correspond to the event lines (E1-E6) in Figure 3 and 4.

| Event # | Study Week | Date        | Event                                                    |
|---------|------------|-------------|----------------------------------------------------------|
| 1       | 1          | Jan 12 2021 | Second provincial emergency declared                     |
| 2       | 4          | Feb 8 2021  | Second provincial emergency expires                      |
| 3       | 7          | Mar 1 2021  | Vaccine appointments begin                               |
| 4       | 7          | Mar 5 2021  | Most regions exit stay-at-home orders due to second wave |
| 5       | 12         | Apr 3 2021  | Third wave stay-at-home orders begins                    |

|   |    |              |                                                            |
|---|----|--------------|------------------------------------------------------------|
| 6 | 22 | June 14 2021 | Third wave stay-at-home order ends, re-opening plan begins |
|---|----|--------------|------------------------------------------------------------|

367 ***Interpretation of coefficient plots***

368 This section explains how to interpret the coefficient plots of the mixed models  
369 below. Every plot shows the amount of change associated with the dependent  
370 variable (questionnaire measure) as there is a +1 unit change in the digital measure  
371 item (independent variable, y-axis). Note that digital measure items were z-score  
372 standardized due to different very scales, so a +1 unit change is a +1 standard  
373 deviation from the mean. Dependent variables were not standardized for future  
374 prediction purposes. Essentially, an association can be positive or negative, and the  
375 value on the x-axis “Estimates” for any predictor on the y-axis would be added to the  
376 dependent variable as there is a +1 unit change for that y-axis predictor.

377 ***Mixed linear models of SHC 2.0 daily questionnaire variant***

378 In this section, the mixed linear model fits for the measures of the SHC 2.0 daily  
379 questionnaire are presented. In the second round of model fits, significant fixed  
380 effects were found for all the daily variant’s individual questions and for the total  
381 questionnaire sum.

382 ***Regressing daily questions 1-3 on device digital measures***

383 Table 4. First round of mixed linear models for daily life satisfaction, daily  
384 psychological well-being, and daily resilience.

|  |                    |
|--|--------------------|
|  | Dependent variable |
|--|--------------------|

|                                      | Daily Q1           |          | Daily Q2          |         | Daily Q3          |         |
|--------------------------------------|--------------------|----------|-------------------|---------|-------------------|---------|
| Measure                              | Life Satisfaction  |          | Well-being        |         | Resilience #1     |         |
| Model #                              | 1                  |          | 2                 |         | 3                 |         |
| Observations                         | 2494               |          | 2494              |         | 2494              |         |
| Participants                         | 46                 |          | 46                |         | 46                |         |
|                                      |                    |          |                   |         |                   |         |
| Device digital measure               | Parameter (SE)     | P-value  | Parameter (SE)    | P-value | Parameter (SE)    | P-value |
| Step count (weekly)                  | -0.079<br>(0.046)  | 0.088    | -<br>0.185(0.034) | 4.2E-08 | -0.001(0.031)     | 0.958   |
| GPS locations visited                | -0.059<br>(0.036)  | 0.105    | 0.068<br>(0.026)  | 0.009   | -0.004(0.025)     | 0.861   |
| Floors walked (up + down)            | 0.24 (0.041)       | 7.67E-09 | -0.065<br>(0.03)  | 0.029   | -0.107<br>(0.028) | 0.000   |
| Campus Dist. (less is closer to UWO) | -0.0915<br>(0.055) | 0.098    | 0.050<br>(0.04)   | 0.206   | -0.099<br>(0.037) | 0.008   |
| System uptime (ms)                   | -0.989<br>(0.147)  | 2.14E-11 | 0.154<br>(0.105)  | 0.144   | -0.026<br>(0.099) | 0.786   |



|                                     |                |       |                |       |                |       |
|-------------------------------------|----------------|-------|----------------|-------|----------------|-------|
| System uptime with deep sleep (ms)  | 0.546 (0.116)  | 0.000 | -0.051 (0.083) | 0.532 | 0.071 (0.078)  | 0.359 |
| Available RAM (bytes)               | -0.023 (0.089) | 0.793 | -0.036 (0.064) | 0.573 | 0.039 (0.060)  | 0.514 |
| Free space (percent)                | -0.323 (0.082) | 0.000 | 0.036 (0.057)  | 0.536 | 0.029 (0.054)  | 0.591 |
| Time spent using SHC 2.0 app (ms)   | 0.079 (0.033)  | 0.016 | -0.023 (0.024) | 0.342 | -0.071 (0.022) | 0.001 |
| Calendar count (daily)              | -0.085 (0.057) | 0.139 | 0.129 (0.041)  | 0.001 | 0.022 (0.039)  | 0.565 |
| Calendar count (weekly)             | 0.019 (0.063)  | 0.758 | -0.063 (0.045) | 0.160 | 0.023 (0.042)  | 0.597 |
| Installed apps (total / List of 40) | 0.009 (0.107)  | 0.932 | -0.105 (0.076) | 0.163 | -0.232 (0.071) | 0.001 |

385

386 *Revised Models #1-3 using significant parameters only, with coefficient plots*

387

388 Table 5. Revised second round (using only significant digital measure items) of  
 389 mixed linear models for daily life satisfaction, daily psychological well-being, and  
 390 daily resilience.  
 391

|                                         | Dependent variable |                |                |
|-----------------------------------------|--------------------|----------------|----------------|
|                                         | Life Satisfaction  | Well-being     | Resilience #1  |
| Revised Model #                         | 1                  | 2              | 3              |
| Observations                            | 3356               | 3376           | 2514           |
| Participants                            | 58                 | 58             | 46             |
|                                         |                    |                |                |
| Device digital measure                  | Parameter (SE)     | Parameter (SE) | Parameter (SE) |
| Step count<br>(weekly)                  |                    | -0.189 (0.025) |                |
| GPS locations visited                   |                    | 0.046 (0.022)  |                |
| Floors walked (up +<br>down)            | 0.115 (0.031)      |                | -0.105 (0.022) |
| Campus Dist. (less is<br>closer to UWO) |                    |                | -0.108 (0.034) |
| System uptime (ms)                      | -0.33 (0.058)      |                |                |
| Free space<br>(percent)                 | -0.212 (0.079)     |                |                |

|                                        |  |               |                |
|----------------------------------------|--|---------------|----------------|
| Time spent using SHC<br>2.0 app (ms)   |  |               | -0.071 (0.020) |
| Calendar count (daily)                 |  | 0.105 (0.034) |                |
| Installed apps (total /<br>List of 40) |  |               | -0.226 (0.070) |

392

393 Figure 5. Coefficient plot for parameters of Model #1 – Daily Life Satisfaction.

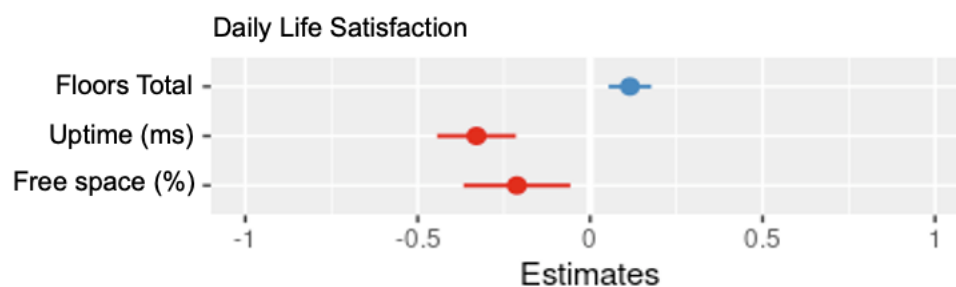

394

395

396 System uptime had a negative association with life satisfaction. There was also a

397 negative association with free space. This suggests less device usage may be

398 associated with increased life satisfaction. There also appeared to be a positive

399 association with floors walked. Based on this model, physical activity did not appear

400 to be associated with increased life satisfaction.

401

402 Figure 6. Coefficient plot for parameters of Model #2 – Daily Psychological Well-

403 being.

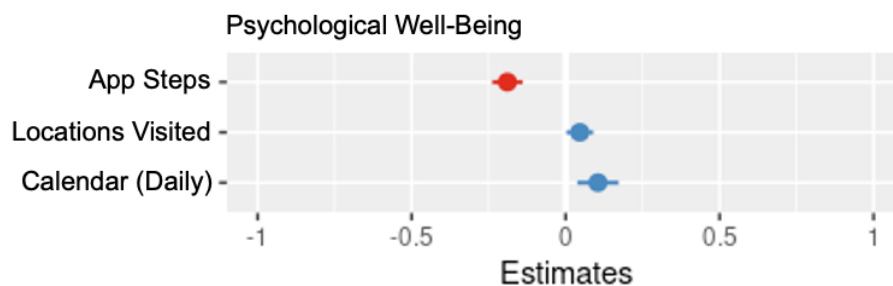

404

405 Surprisingly, app steps had a negative association with daily psychological well-  
406 being. There were positive associations with locations visited (to an extent) and  
407 daily calendar counts, suggesting more life activity was related to psychological  
408 well-being.

409

410 Figure 7. Coefficient plot for parameters of Model #3 – Daily Resilience Measure #1.

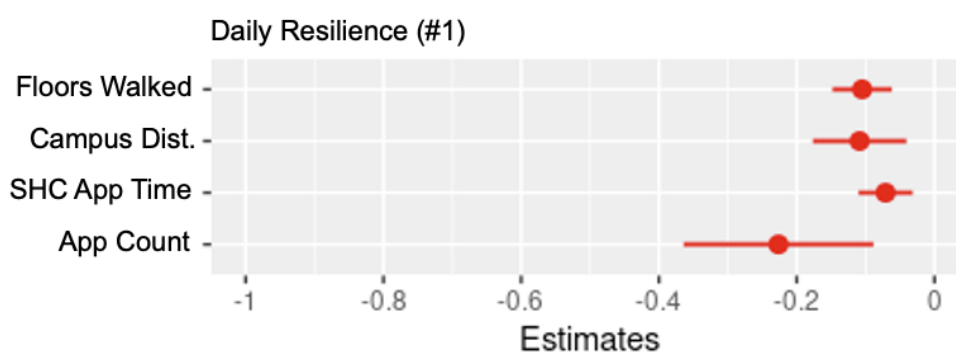

411

412 Floors walked, device usage via SHC 2.0 total app use time, and installed apps all had  
413 negative associations with the first daily measure of resilience. There also was a  
414 positive association with proximity to campus.

415 *Regressing daily questions 4-6 on device digital measures*

416 Table 6 shows the results of three mixed linear models relating device digital  
 417 measures to a first daily measure of anxiety, a daily measure of depression, and a  
 418 daily measure of community connectedness.

419

420 Table 6. First round of mixed linear models for daily anxiety, daily depression, and  
 421 daily community connectedness.

|                        | Dependent variable |         |                |         |                     |         |
|------------------------|--------------------|---------|----------------|---------|---------------------|---------|
|                        | Daily Q4           |         | Daily Q5       |         | Daily Q6            |         |
| Measure                | Anxiety #1         |         | Depression     |         | Comm.<br>Connected. |         |
| Model #                | 4                  |         | 5              |         | 6                   |         |
| Observations           | 2494               |         | 2494           |         | 2494                |         |
| Participants           | 46                 |         | 46             |         | 46                  |         |
|                        |                    |         |                |         |                     |         |
| Device digital measure | Parameter (SE)     | P-value | Parameter (SE) | P-value | Parameter (SE)      | P-value |
| Step count (weekly)    | -0.04(0.021)       | 0.069   | 0.061 (0.016)  | 0.000   | 0.054 (0.028)       | 0.057   |
| GPS locations visited  | 0.039 (0.017)      | 0.022   | 0.026 (0.013)  | 0.049   | 0.097 (0.022)       | 0.000   |

|                                             |                   |       |                   |       |                    |       |
|---------------------------------------------|-------------------|-------|-------------------|-------|--------------------|-------|
| Floors walked<br>(up + down)                | -0.051<br>(0.019) | 0.007 | -0.047<br>(0.014) | 0.001 | 0.0041<br>(0.025)  | 0.871 |
| Campus Dist.<br>(less is closer<br>to UWO)  | -0.022<br>(0.025) | 0.382 | 0.050<br>(0.019)  | 0.011 | -0.127<br>(0.034)  | 0.000 |
| System<br>uptime (ms)                       | 0.237 (0.068)     | 0.000 | 0.254<br>(0.052)  | 0.000 | 0.218 (0.090)      | 0.017 |
| System<br>uptime with<br>deep sleep<br>(ms) | -0.067<br>(0.053) | 0.214 | -0.193<br>(0.042) | 0.000 | -0.208<br>(0.072)  | 0.004 |
| Available<br>RAM (bytes)                    | 0.023 (0.041)     | 0.564 | -0.008<br>(0.031) | 0.789 | -0.0545<br>(0.054) | 0.321 |
| Free space<br>(percent)                     | -0.062<br>(0.038) | 0.105 | 0.021<br>(0.031)  | 0.498 | 0.072 (0.051)      | 0.157 |
| Time spent<br>using SHC 2.0<br>app (ms)     | 0.015 (0.015)     | 0.328 | -0.013<br>(0.011) | 0.276 | -0.035<br>(0.020)  | 0.085 |
| Calendar<br>count (daily)                   | 0.011 (0.026)     | 0.686 | 0.006<br>(0.021)  | 0.771 | -0.061<br>(0.036)  | 0.084 |

|                                           |                   |       |                   |       |                   |       |
|-------------------------------------------|-------------------|-------|-------------------|-------|-------------------|-------|
| Calendar<br>count<br>(weekly)             | -0.015<br>(0.029) | 0.622 | -0.016<br>(0.022) | 0.483 | 0.104 (0.039)     | 0.008 |
| Installed apps<br>(total /<br>List of 40) | -0.148<br>(0.049) | 0.003 | -0.045<br>(0.039) | 0.255 | -0.225<br>(0.066) | 0.000 |

422

423 *Revised Models #4-6 using significant parameters only, with coefficient plots*

424

425 Table 7. Revised second round (using only significant digital measure items) of

426 mixed linear models for daily anxiety, daily depression, and daily community

427 connectedness.

428

|                        | Dependent variable |                |                            |
|------------------------|--------------------|----------------|----------------------------|
|                        | Anxiety #1         | Depression     | Community<br>Connectedness |
| Revised Model #        | 4                  | 5              | 6                          |
| Observations           | 4573               | 2514           | 2514                       |
| Participants           | 73                 | 46             | 46                         |
|                        |                    |                |                            |
| Device digital measure | Parameter (SE)     | Parameter (SE) | Parameter (SE)             |
| Step count             |                    | 0.061 (0.016)  | 0.066 (0.023)              |

|                                      |                |                |                |
|--------------------------------------|----------------|----------------|----------------|
| (weekly)                             |                |                |                |
| GPS locations visited                |                | 0.028 (0.012)  | 0.096 (0.022)  |
| Floors walked (up + down)            |                | -0.044 (0.014) |                |
| Campus Dist. (less is closer to UWO) |                | 0.043 (0.019)  | -0.130 (0.032) |
| System uptime (ms)                   | -0.037 (0.012) | 0.237 (0.047)  |                |
| System uptime with deep sleep (ms)   |                | -0.182 (0.039) | -0.054 (0.032) |
| Calendar count (weekly)              |                |                | 0.079 (0.033)  |
| Installed apps (total / List of 40)  | -0.165 (0.038) |                | -0.221 (0.065) |

429

430 Figure 8. Coefficient plot for parameters of Model #4 – daily anxiety measure #1.

431

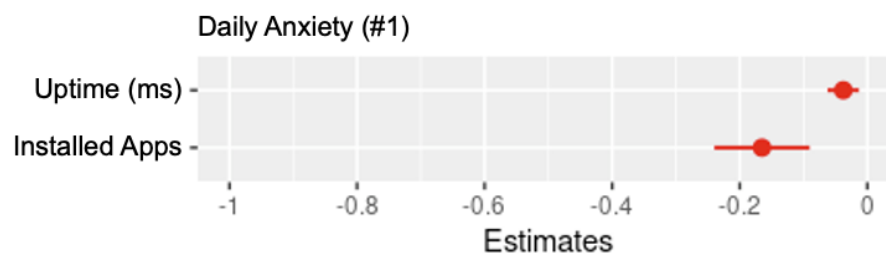

432

433



434 Uptime had a small negative association with the first measure of daily anxiety.  
435 There was a more significant negative association with the number of installed apps.  
436 Figure 9. Coefficient plot for parameters of Model #5 – daily depression.

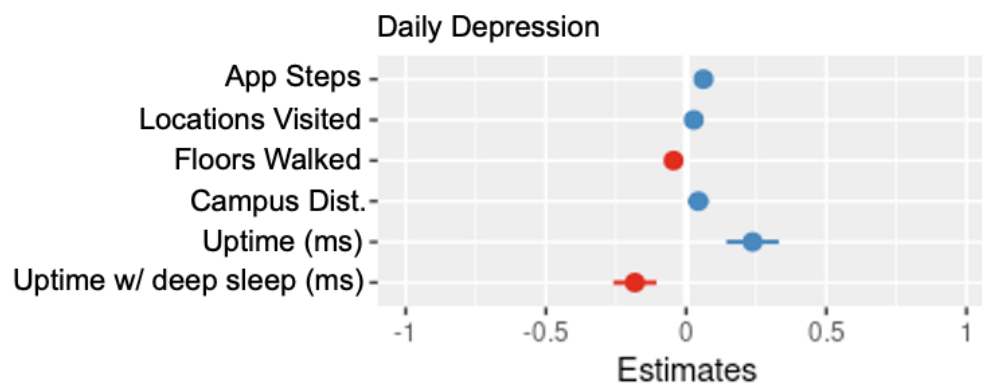

437

438

439 App steps and locations visited had minor positive associations with daily  
440 depression. There was a positive association with system uptime and daily  
441 depression, and a negative association with system sleep time and depression.

442

443 Figure 10. Coefficient plot for parameters of Model #6 – daily community

444 connectedness.

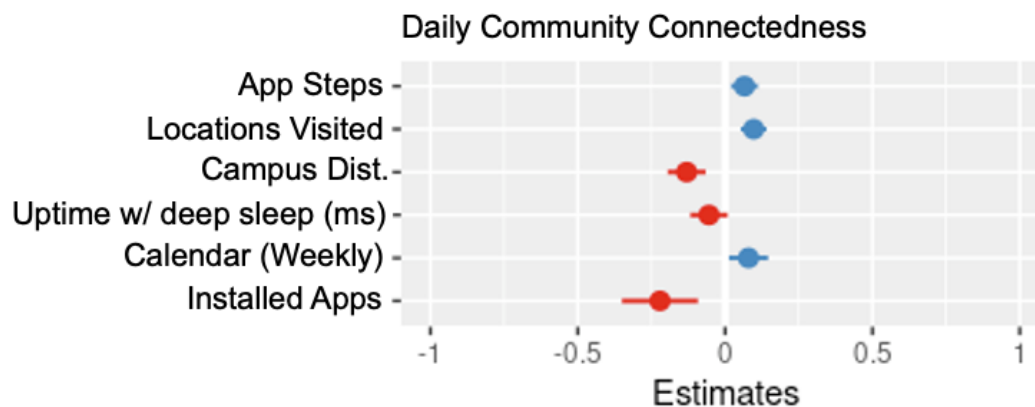

445

446 App steps, locations visited, and proximity to campus had positive associations with  
 447 daily community connectedness. There was a negative association with the number  
 448 of installed apps and system sleep time with community connectedness. The  
 449 number of weekly calendar events also had a positive association with community  
 450 connectedness.

451 *Regressing daily questions 7-9 on device digital measures*

452 Table 8 shows the results of three mixed linear models relating device digital  
 453 measures to a second daily measure of anxiety, a daily measure of distress, and a  
 454 second daily measure of resilience.

455 Table 8. First round of mixed linear models for daily anxiety, distress, and resilience.

|                        | Dependent variable |         |                |          |                |         |
|------------------------|--------------------|---------|----------------|----------|----------------|---------|
|                        | Daily Q7           |         | Daily Q8       |          | Daily Q9       |         |
| Measure                | Anxiety #2         |         | Distress       |          | Resilience #2  |         |
| Model #                | 7                  |         | 8              |          | 9              |         |
| Observations           | 2494               |         | 2494           |          | 2494           |         |
| Participants           | 46                 |         | 46             |          | 46             |         |
|                        |                    |         |                |          |                |         |
| Device digital measure | Parameter (SE)     | P-value | Parameter (SE) | P-value  | Parameter (SE) | P-value |
| Step count (weekly)    | 0.099 (0.031)      | 0.001   | -0.266 (0.049) | 7.11E-08 | -0.1 (0.026)   | 0.000   |

|                                      |                   |       |                   |          |                   |         |
|--------------------------------------|-------------------|-------|-------------------|----------|-------------------|---------|
| GPS locations visited                | 0.087 (0.024)     | 0.000 | -0.134<br>(0.038) | 0.000    | 0.122 (0.021)     | 3.7E-09 |
| Floors walked (up + down)            | 0.057 (0.028)     | 0.039 | 0.089<br>(0.044)  | 0.041    | 0.107 (0.023)     | 0.000   |
| Campus Dist. (less is closer to UWO) | -0.085<br>(0.036) | 0.022 | -0.201<br>(0.057) | 0.000    | -0.131<br>(0.031) | 0.000   |
| System uptime (ms)                   | 0.027 (0.099)     | 0.784 | 0.111<br>(0.154)  | 0.470    | 0.19 (0.083)      | 0.023   |
| System uptime with deep sleep (ms)   | 0.113 (0.077)     | 0.146 | -0.133<br>(0.12)  | 0.267    | -0.167<br>(0.065) | 0.01    |
| Available RAM (bytes)                | 0.012 (0.06)      | 0.84  | -0.022<br>(0.094) | 0.815    | -0.01 (0.05)      | 0.838   |
| Free space (percent)                 | 0.059 (0.053)     | 0.271 | 0.031<br>(0.08)   | 0.693    | -0.091<br>(0.045) | 0.045   |
| Time spent using SHC 2.0 app (ms)    | -0.056<br>(0.022) | 0.012 | 0.064<br>(0.035)  | 0.067    | -0.05 (0.018)     | 0.006   |
| Calendar count (daily)               | 0.028 (0.038)     | 0.462 | -0.243<br>(0.06)  | 5.85E-05 | -0.05 (0.033)     | 0.124   |

|                                     |               |       |              |       |               |       |
|-------------------------------------|---------------|-------|--------------|-------|---------------|-------|
| Calendar count (weekly)             | -0.17 (0.042) | 0.000 | 0.207 (0.07) | 0.001 | 0.023 (0.036) | 0.52  |
| Installed apps (total / List of 40) | 0.192 (0.07)  | 0.006 | 0.07 (0.105) | 0.502 | 0.17 (0.06)   | 0.004 |

456

457 *Revised Models #7-9 using significant parameters only, with coefficient plots*

458 Table 9. Revised second round (using only significant digital measure items) of

459 mixed linear models for anxiety measure #2, distress, and resilience measure #2.

|                        | Dependent variable |                |                |
|------------------------|--------------------|----------------|----------------|
|                        | Anxiety #2         | Distress       | Resilience #2  |
| Revised Model #        | 7                  | 8              | 9              |
| Observations           | 2514               | 2514           | 2494           |
| Participants           | 46                 | 46             | 46             |
| Device digital measure | Parameter (SE)     | Parameter (SE) | Parameter (SE) |
| Step count (weekly)    | 0.08 (0.030)       | -0.27 (0.048)  | -0.099 (0.026) |
| GPS locations visited  | 0.110 (0.023)      | -0.142 (0.036) | 0.12 (0.02)    |

|                                      |                |                |                |
|--------------------------------------|----------------|----------------|----------------|
| Floors walked (up + down)            | 0.07 (0.027)   | 0.091 (0.043)  | 0.105 (0.023)  |
| Campus Dist. (less is closer to UWO) | -0.098 (0.035) | -0.203 (0.055) | -0.13 (0.031)  |
| System uptime (ms)                   |                |                | 0.19 (0.083)   |
| System uptime with deep sleep (ms)   |                |                | -0.165 (0.065) |
| Free space (percent)                 |                |                | -0.091 (0.045) |
| Time spent using SHC 2.0 app (ms)    | -0.048 (0.02)  |                | -0.051 (0.018) |
| Calendar count (daily)               |                | -0.24 (0.060)  |                |
| Calendar count (weekly)              | -0.155 (0.036) | 0.21 (0.065)   |                |
| Installed apps (total / List of 40)  | 0.195 (0.0695) |                | 0.169 (0.059)  |

460

461 Figure 11. Coefficient plot for parameters of Model #7 – daily anxiety measure #2.

462

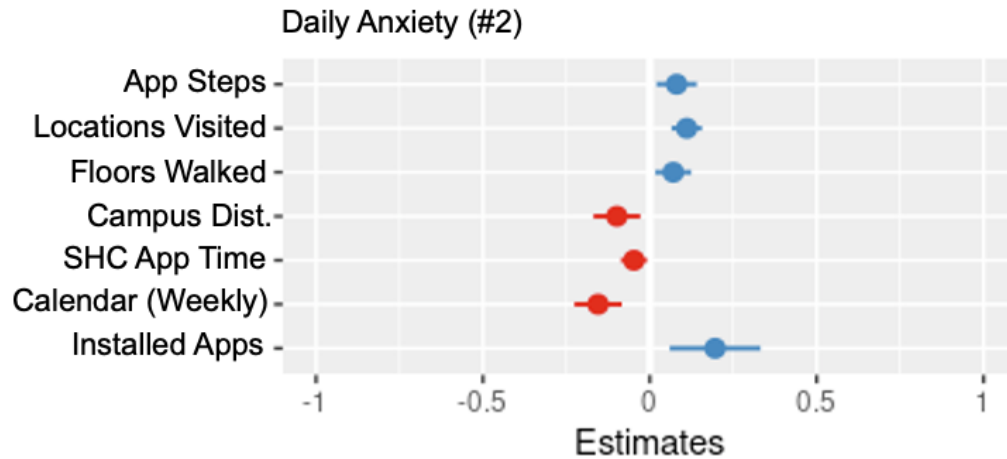

463

464

465 Physical activity (app steps, locations visited, floors walked) and proximity to  
466 campus had slight positive associations with anxiety, while installed apps had a  
467 more positive association with anxiety. There was a negative association with  
468 weekly calendar events.

469 Figure 12. Coefficient plot for parameters of Model #8 – Psychological Distress

470

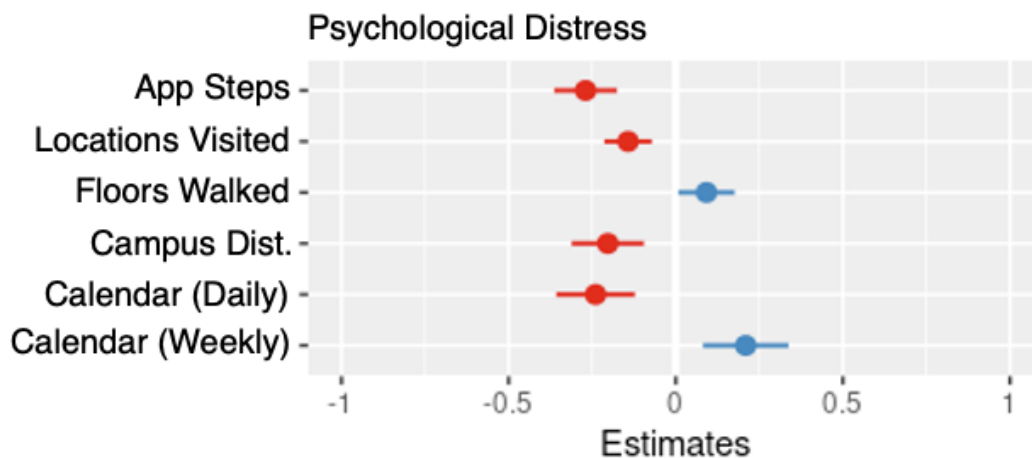

471

472

473 Some measures of physical activity (app steps, locations visited) and daily calendar  
474 events had a negative association with distress. Proximity to campus, floors walked,  
475 and weekly calendar events had a positive association with distress.

476

477 Figure 13. Coefficient plot for parameters of Model #9 – daily resilience measure #2.

478

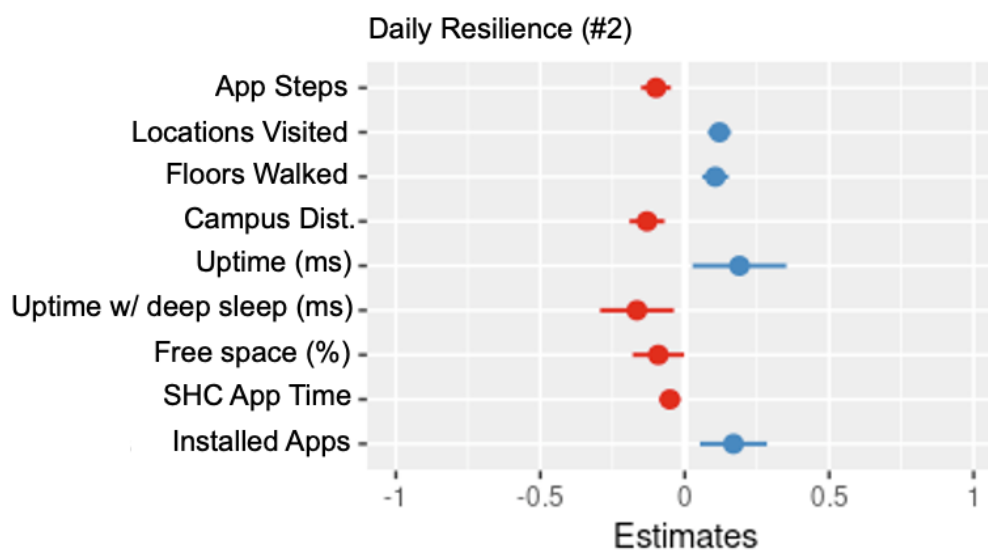

479

480

481 App steps had a slight negative association with the second daily measure of  
482 resilience. System sleep time, free space also had negative associations with this  
483 measure of daily resilience. Locations visited, floors walked, proximity to campus,  
484 system uptime, and installed app count all had positive associations with this  
485 measure of resilience.

486 *Result of Model #10: Regressing daily total questionnaire sum on device digital*

487 *measures*

488

489 Table 10. Revised second round (using only significant device digital measure items)

490 of mixed linear model relating daily questionnaire sum to device digital measures.

491 The first model is omitted for brevity. The initial model is included as an Appendix.

492

|                                     | Dependent variable              |
|-------------------------------------|---------------------------------|
|                                     | Daily questionnaire variant sum |
| Revised Model #                     | 10                              |
| Observations                        | 2514                            |
| Participants                        | 46                              |
|                                     |                                 |
| Device digital measure              | Parameter (SE)                  |
| Floors walked (up + down)           | 0.669 (0.118)                   |
| Location flag                       | -0.576 (0.186)                  |
| System uptime (ms)                  | -0.56 (0.226)                   |
| Calendar count (daily)              | -0.47 (0.18)                    |
| Installed apps (total / List of 40) | 0.72 (0.38)                     |

493



494

495

496 Figure 14. Coefficient plot for parameters of Model #10 – daily questionnaire sum.

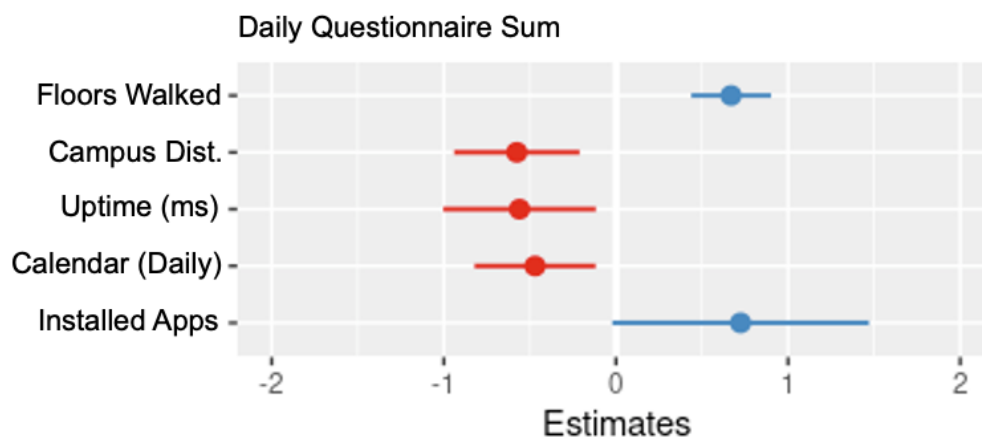

497

498

499 Floors walked, proximity to campus, and installed app count had positive

500 associations with the daily questionnaire sum. System uptime and daily calendar

501 events had negative associations with the daily questionnaire sum.

#### 502 **Mixed linear models of SHC 2.0 weekly questionnaire variant**

503 In this section, the mixed linear model fits for the measures of the SHC 2.0 weekly

504 questionnaire variant are presented. Note that for several weekly questions, mixed

505 linear model fits did not yield any significant associations. This was the case for

506 questions: 2 (psychological well-being), 5 (depression), and 6 (community

507 connectedness).

508 *Regressing weekly questions 1, 3, and 4 on device digital measures*

509 Table 11 shows the results of three mixed linear models relating device digital  
 510 measures to weekly life satisfaction, a first weekly measure of resilience, and a first  
 511 weekly measure of anxiety.

512 Table 11. First round of mixed linear models for weekly life satisfaction, weekly  
 513 resilience, and weekly anxiety.

|                        | Dependent variable |         |                |         |                |         |
|------------------------|--------------------|---------|----------------|---------|----------------|---------|
|                        | Weekly Q1          |         | Weekly Q3      |         | Weekly Q4      |         |
|                        | Life Satisfaction  |         | Resilience #1  |         | Anxiety #1     |         |
| Model #                | 11                 |         | 12             |         | 13             |         |
| Observations           | 992                |         | 992            |         | 1003           |         |
| Participants           | 44                 |         | 44             |         | 44             |         |
|                        |                    |         |                |         |                |         |
| Device digital measure | Parameter (SE)     | P-value | Parameter (SE) | P-value | Parameter (SE) | P-value |
| Step count (weekly)    | 0.107 (0.058)      | 0.066   | 0.0683 (0.041) | 0.096   | 0.022 (0.032)  | 0.498   |
| GPS locations visited  | 0.014 (0.043)      | 0.747   | -0.098 (0.03)  | 0.001   | 0.077 (0.023)  | 0.001   |

|                                             |                   |       |                   |       |                   |              |
|---------------------------------------------|-------------------|-------|-------------------|-------|-------------------|--------------|
| Floors walked<br>(up + down)                | 0.032 (0.065)     | 0.620 | -0.113<br>(0.046) | 0.013 | -0.182<br>(0.035) | 3.31E-<br>07 |
| Campus Dist.<br>(less is closer<br>to UWO)  | -0.258 (0.07)     | 0.000 | 0.184<br>(0.049)  | 0.000 | 0.075 (0.04)      | 0.048        |
| System<br>uptime (ms)                       | -0.696<br>(0.245) | 0.004 | 0.193<br>(0.172)  | 0.259 | 0.022 (0.133)     | 0.865        |
| System<br>uptime with<br>deep sleep<br>(ms) | 0.461 (0.165)     | 0.005 | -0.044<br>(0.116) | 0.707 | -0.073<br>(0.089) | 0.412        |
| Available<br>RAM (bytes)                    | 0.072 (0.102)     | 0.478 | 0.064<br>(0.072)  | 0.37  | -0.062<br>(0.055) | 0.260        |
| Free space<br>(percent)                     | -0.173<br>(0.168) | 0.304 | 0.303<br>(0.1171) | 0.01  | 0.061 (0.085)     | 0.471        |
| Time spent<br>using SHC 2.0<br>app (ms)     | -0.036<br>(0.067) | 0.589 | -0.014<br>(0.047) | 0.763 | 0.059 (0.036)     | 0.108        |
| Calendar<br>count (daily)                   | 0.164 (0.064)     | 0.011 | 0.012<br>(0.045)  | 0.786 | -0.039<br>(0.035) | 0.269        |

|                                           |                   |       |                   |       |                   |       |
|-------------------------------------------|-------------------|-------|-------------------|-------|-------------------|-------|
| Calendar<br>count<br>(weekly)             | -0.152<br>(0.109) | 0.163 | 0.008<br>(0.076)  | 0.916 | -0.093<br>(0.059) | 0.115 |
| Installed apps<br>(total /<br>List of 40) | 0.766 (0.155)     | 0.000 | -0.369<br>(0.108) | 0.000 | -0.182 (0.08)     | 0.025 |

514

515 *Revised Models #11-13 using significant parameters only, with coefficient plots*

516 Table 12. Revised second round (using only significant digital measure items) of

517 mixed linear models for weekly life satisfaction, weekly resilience measure #1,

518 weekly anxiety measure #1.

|                        | Dependent variable |                |                |
|------------------------|--------------------|----------------|----------------|
|                        | Life satisfaction  | Resilience #1  | Anxiety #1     |
| Revised Model #        | 11                 | 12             | 13             |
| Observations           | 1003               | 992            | 1003           |
| Participants           | 44                 | 44             | 44             |
|                        |                    |                |                |
| Device digital measure | Parameter (SE)     | Parameter (SE) | Parameter (SE) |
| Step count<br>(weekly) | 0.125 (0.051)      |                |                |
| GPS locations visited  |                    | -0.093 (0.029) | 0.075 (0.023)  |

|                                     |                |                |                |
|-------------------------------------|----------------|----------------|----------------|
| Floors walked (up + down)           |                | -0.076 (0.041) | -0.180 (0.032) |
| Location flag                       | -0.221 (0.063) | 0.167 (0.048)  | 0.086 (0.035)  |
| System uptime (ms)                  | -0.735 (0.220) |                |                |
| System uptime with deep sleep (ms)  | 0.488 (0.151)  |                |                |
| Free space (percent)                |                | 0.287 (0.113)  |                |
| Calendar count (daily)              | 0.103 (0.049)  |                |                |
| Installed apps (total / List of 40) | 0.769 (0.15)   | -0.311 (0.103) | -0.205 (0.077) |

519

520 Figure 15. Coefficient plot for parameters of Model #11 – weekly life satisfaction.

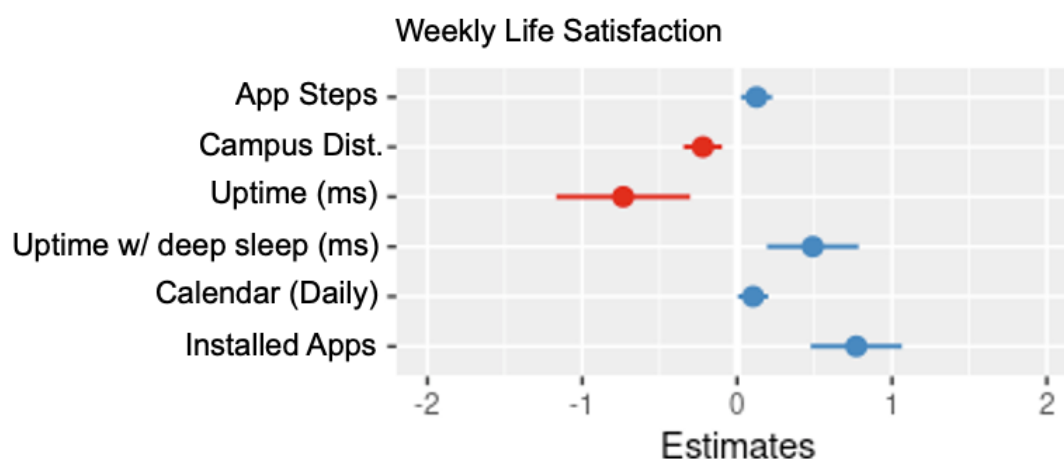

521

522

523 App steps, calendar events on the day the weekly variant was completed, proximity  
524 to campus, and installed app count all had positive associations with weekly life  
525 satisfaction. There was a positive association with system sleep time which may be  
526 indicative of participants getting more sleep. There was a corresponding negative  
527 association with system uptime.

528 Figure 16. Coefficient plot for parameters of Model #12 – weekly resilience measure  
529 #1.

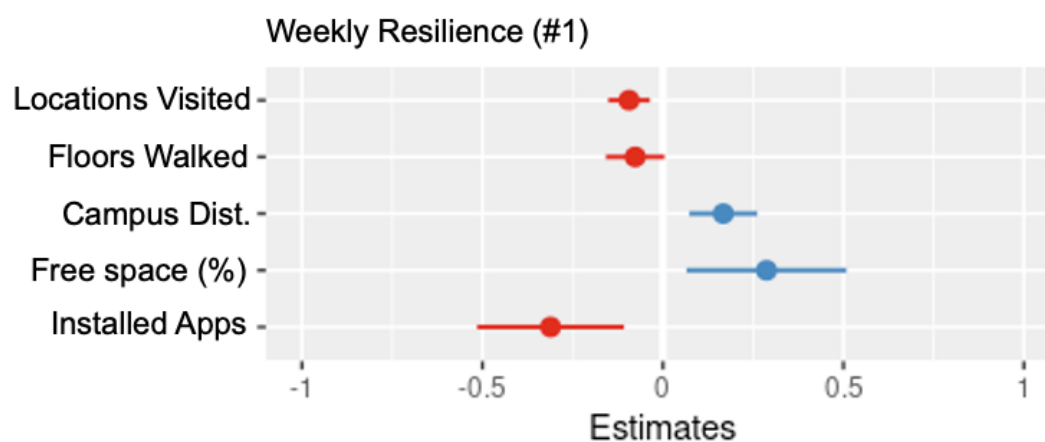

530  
531 The first measure of weekly resilience had a positive association with distance from  
532 campus and device free space. Weekly resilience had a negative association with  
533 installed app count, locations visited, and floors walked.

534 Figure 17. Coefficient plot for parameters of Model #13 – weekly anxiety measure  
535 #1.

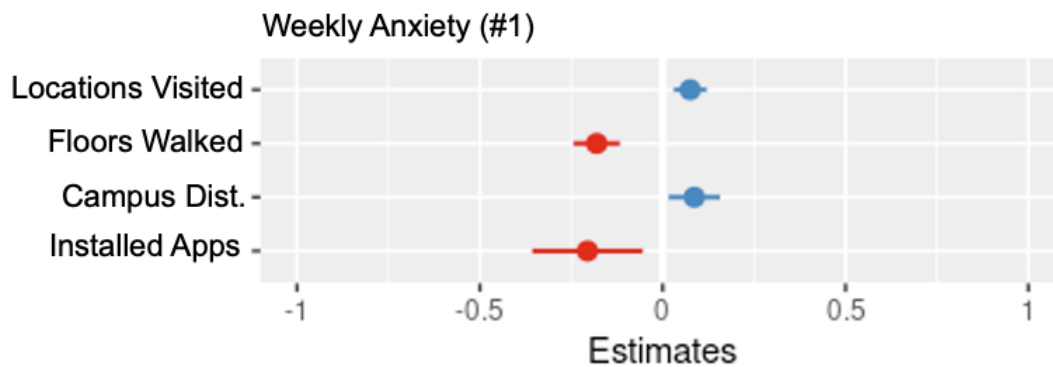

536

537 There was a slight positive association with locations visited and weekly anxiety.

538 This weekly anxiety measure had negative associations with floors walked, installed

539 app count, and proximity to campus.

540 *Regressing weekly questions 7, 8, and 9 on device digital measures*

541 Table 13 shows the results of three mixed linear models relating device digital

542 measures to weekly physical activity, a second measure of anxiety, and a second

543 measure of resilience.

544 Table 13. First round of mixed linear models for weekly physical activity, weekly

545 anxiety, and weekly resilience.

|              | Dependent variable |  |            |  |               |  |
|--------------|--------------------|--|------------|--|---------------|--|
|              | Weekly Q7          |  | Weekly Q8  |  | Weekly Q9     |  |
|              | Physical Activity  |  | Anxiety #2 |  | Resilience #2 |  |
| Model #      | 14                 |  | 15         |  | 16            |  |
| Observations | 1443               |  | 1443       |  | 1003          |  |

|                                      |                |          |                |          |                |          |
|--------------------------------------|----------------|----------|----------------|----------|----------------|----------|
| Participants                         | 60             |          | 60             |          | 44             |          |
| Device digital measure               | Parameter (SE) | P-value  | Parameter (SE) | P-value  | Parameter (SE) | P-value  |
| Step count (weekly)                  | 0.384 (0.082)  | 3.15E-06 | -0.049 (0.087) | 5.77E-01 | -0.117 (0.040) | 4.08E-03 |
| GPS locations visited                | 0.032 (0.059)  | 0.585    | -0.04 (0.063)  | 0.525    | -0.027 (0.029) | 0.357    |
| Floors walked (up + down)            | 0.091 (0.091)  | 0.317    | -0.356 (0.097) | 0.000    | 0.146 (0.045)  | 0.001    |
| Campus Dist. (less is closer to UWO) | 0.076 (0.095)  | 0.423    | 0.09 (0.095)   | 0.347    | -0.105 (0.047) | 0.026    |
| System uptime (ms)                   | -0.949 (0.334) | 0.004    | 0.196 (0.334)  | 0.557    | 0.41 (0.167)   | 0.014    |
| System uptime with deep sleep (ms)   | 0.588 (0.224)  | 0.0089   | -0.027 (0.221) | 0.901    | -0.217 (0.112) | 0.054    |
| Available RAM (bytes)                | -0.052 (0.144) | 0.718    | 0.1 (0.158)    | 0.526    | 0.007 (0.071)  | 0.915    |



|                                           |                   |       |                   |       |                   |       |
|-------------------------------------------|-------------------|-------|-------------------|-------|-------------------|-------|
| Free space<br>(percent)                   | 0.497<br>(0.191)  | 0.011 | -0.138<br>(0.147) | 0.352 | 0.061 (0.1)       | 0.54  |
| Time spent<br>using SHC 2.0<br>app (ms)   | -0.038<br>(0.094) | 0.681 | 0.026 (0.1)       | 0.795 | -0.099<br>(0.046) | 0.034 |
| Calendar<br>count (daily)                 | 0.347 (0.09)      | 0.000 | -0.257<br>(0.096) | 0.007 | 0.053 (0.045)     | 0.235 |
| Calendar<br>count<br>(weekly)             | -0.334<br>(0.148) | 0.024 | 0.188<br>(0.146)  | 0.198 | -0.164<br>(0.074) | 0.026 |
| Installed apps<br>(total /<br>List of 40) | -0.134<br>(0.189) | 0.478 | -0.124<br>(0.161) | 0.441 | -0.18 (0.097)     | 0.065 |

546

547 *Revised Models #14-16 using significant parameters only, with coefficient plots*

548 Table 14. Revised second round (using only significant digital measure items) of

549 mixed linear models for weekly physical activity, a second weekly anxiety measure,

550 and a second weekly measure of resilience.

|                 | Dependent variable |            |               |
|-----------------|--------------------|------------|---------------|
|                 | Physical Activity  | Anxiety #2 | Resilience #2 |
| Revised Model # | 14                 | 15         | 16            |
| Observations    | 1443               | 1443       | 1003          |

|                                       |                |                  |                |
|---------------------------------------|----------------|------------------|----------------|
| Participants                          | 60             | 60               | 44             |
|                                       |                |                  |                |
| Device digital measure                | Parameter (SE) | Parameter (SE)   | Parameter (SE) |
| Step count<br>(weekly)                | 0.303 (0.063)  |                  | -0.127 (0.038) |
| Floors walked (up +<br>down)          |                | -0.32163 (0.069) | 0.143 (0.044)  |
| Location flag                         |                |                  | -0.129 (0.043) |
| System uptime (ms)                    | -0.762 (0.221) |                  |                |
| System uptime with<br>deep sleep (ms) | 0.589 (0.137)  |                  |                |
| Calendar count (daily)                | 0.256 (0.077)  | -0.163 (0.059)   |                |
| Calendar count<br>(weekly)            | -0.287 (0.132) |                  |                |

551

552 Figure 18. Coefficient plot for parameters of Model #14 – weekly physical activity.

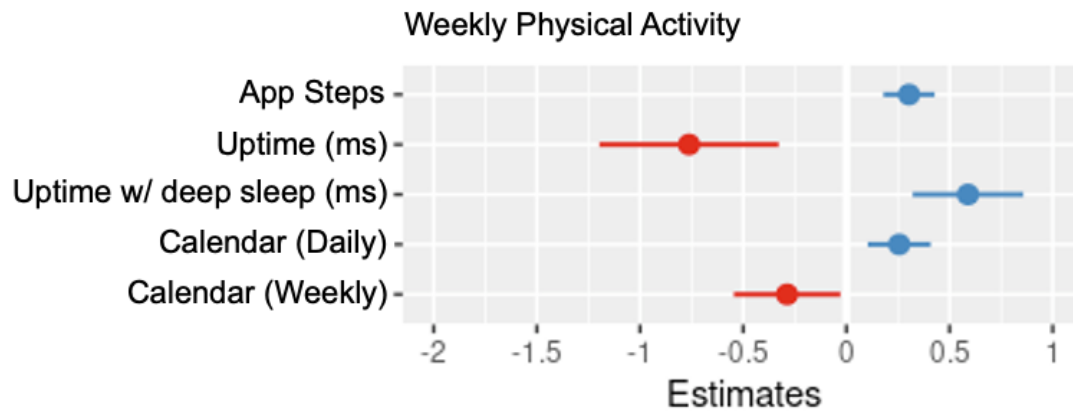

553

554

555 As expected, app steps had a positive association with weekly physical activity.

556 There was also a significant negative association in system up time, but a positive

557 association with system sleep time, which may be indicative of physically active

558 participants getting more sleep. Physically active participants had associations with

559 more events on the day they completed the weekly survey, but a negative

560 association with events throughout their week.

561

562 Figure 19. Coefficient plot for parameters of Model #15 – weekly anxiety measure

563 #2.

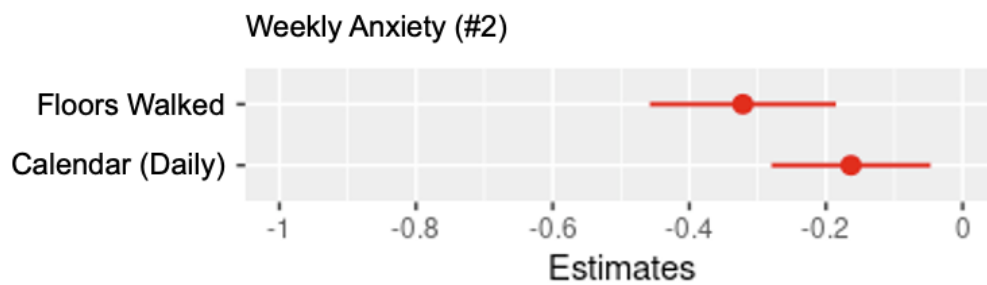

564

565 Like the first weekly anxiety measure, this measure of anxiety had a negative  
566 association with floors walked. Calendar events, on the day the weekly  
567 questionnaire was answered, also had a negative association with anxiety in this  
568 second measure.

569

570 Figure 20. Coefficient plot for parameters of Model #16 – weekly resilience measure

571 #2.

572

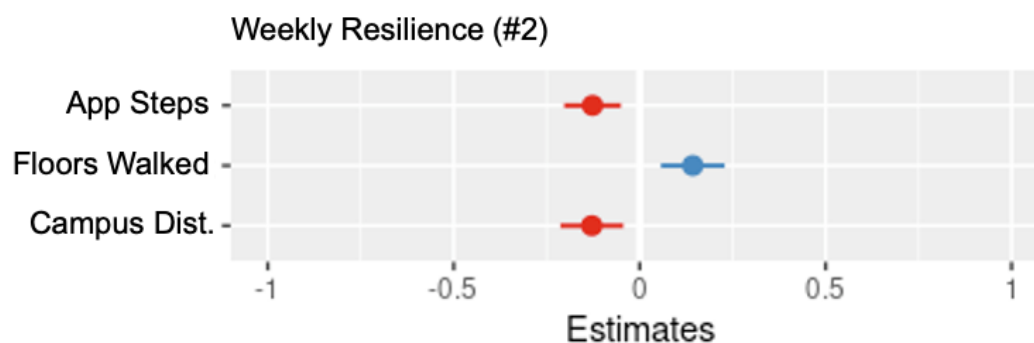

573

574 App steps had a negative association with this second measure of weekly resilience.

575 There was a positive association with floors walked, and proximity to campus.

576 *Result of Model #17: Regressing weekly total questionnaire sum on device digital*

577 *measures*

578 Table 15. Revised second round (using only significant digital measure items) of

579 mixed linear model for weekly questionnaire sum and device digital measures. The

580 first model is omitted for brevity. The initial model is included as an Appendix.

581

|                                         |                                        |
|-----------------------------------------|----------------------------------------|
|                                         | Dependent variable                     |
|                                         | Weekly<br>questionnaire<br>variant sum |
| Revised Model #                         | 17                                     |
| Observations                            | 1003                                   |
| Participants                            | 44                                     |
|                                         |                                        |
| Device digital measure                  | Parameter (SE)                         |
| Floors walked (up +<br>down)            | 0.748 (0.207)                          |
| Campus Dist. (less is<br>closer to UWO) | -0.881 (0.230)                         |
| System uptime (ms)                      | -2.789 (0.802)                         |
| System uptime with<br>deep sleep (ms)   | 1.730 (0.545)                          |
| Calendar count (daily)                  | 0.492 (0.180)                          |
| Installed apps (total /<br>List of 40)  | 1.644 (0.553)                          |

582

583

584 Figure 21. Coefficient plot for parameters of Model #17 – sum of weekly  
585 questionnaire.

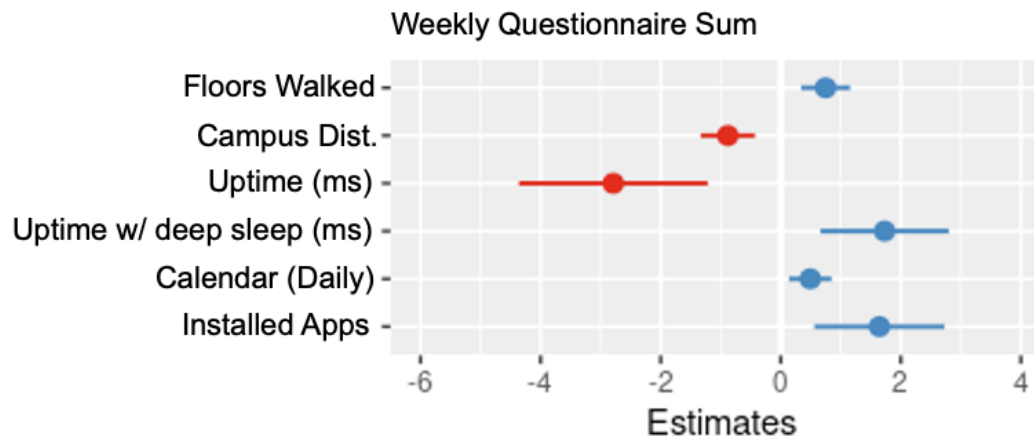

586  
587 Floors walked, proximity to campus, system sleep time, installed apps, and to a  
588 lesser extent, calendar events the day this was answered, all had positive  
589 associations with the weekly questionnaire sum. System uptime had a negative  
590 association with the weekly questionnaire sum. These results may suggest  
591 participants were getting more sleep, despite the weekly score seemingly being  
592 associated with an increase in installed apps.

## 593 Discussion

### 594 Principal Results

595 The results from the SHC 2.0 study over this period did not yield as interesting  
596 results as an initial analysis of our SPE study data<sup>30</sup>, likely due to the smaller sample  
597 size (N=86 compared to N=315) and reduced number of observations (N=6518  
598 compared to N=25985) in comparison. However, some significant associations were  
599 still identified.

600

601 While there was a reasonable amount of data collected via the daily questionnaire,  
602 some results showed small effect sizes and were occasionally conflicting where  
603 there were multiple questions for the same measure, such as for resilience and  
604 anxiety. System uptime had a negative association with life satisfaction. Physical  
605 activity (app steps) appeared to have a negative association with daily psychological  
606 well-being, although this may be related to the small sample size of the study. Daily  
607 anxiety results were conflicting. The first measure suggested installed app count had  
608 a negative association with daily anxiety; the second measure showed the opposite  
609 of this. Other findings, such as the positive associations with app steps, locations  
610 visited, floors walked, proximity to campus, were minor. Daily resilience did appear  
611 to be associated with proximity to campus and negatively associated with use of the  
612 SHC 2.0 app. There also appeared to be a positive association with device uptime,  
613 although other results were conflicting. Daily community connectedness appeared  
614 to be associated with proximity to campus. System uptime had a positive association  
615 with daily depression. There were some significant associations with device digital  
616 measures and the daily questionnaire sum, although none were related to physical  
617 activity.

618 For the weekly questionnaire, certain interesting results were found. For instance,  
619 device sleep time and install app count had a positive association with weekly life  
620 satisfaction. Device sleep time and daily calendar events had a positive association  
621 with physical activity. This may indicate participants were getting more sleep or just  
622 using their devices less when physically active. The significant associations found

623 with both weekly resilience questions were inconsistent. Floors walked, installed  
624 app count, and calendar counts had a negative association with weekly anxiety. Like  
625 the daily questionnaire, there were some significant associations between device  
626 digital measures and the weekly questionnaire sum, although none were related to  
627 physical activity. For three weekly questions (2 - psychological well-being, 5 -  
628 depression, and 6 - community connectedness) the mixed linear model fits did not  
629 yield any significant associations.

### 630 **Limitations**

631 The models have some limitations which likely impacted the results. Missingness  
632 did vary on a weekly/daily basis and it likely impacted the results. For instance,  
633 there were about 2500 complete case observations from 46 participants daily and  
634 1000-1500 complete case observations from 40-60 participants weekly. The sample  
635 size is relatively small compared to the total population of a mid-size university in  
636 Canada, although there are a reasonable number of observations for the  
637 participants. We were unable to analyze call/text message data from participants  
638 due to increasing privacy restrictions on Android/iOS.

### 639 **Conclusions**

640 Undergraduate studies (and pandemics) present unique conditions - and  
641 opportunities - for surveillance efforts with regards to mental health. This research  
642 found that there were some significant associations between phone digital measures  
643 and mental health-related self-reports from undergraduates in Ontario, Canada  
644 during pandemic conditions. Future opportunities for research include



645 investigations into predictive modelling via machine learning or other means, the  
646 comparison of post-pandemic data, and the development of new interventions, such  
647 as interactive virtual assistants, or others of ranging complexity, which could  
648 potentially incorporate the evidence presented here. While an initial analysis of our  
649 related SPE study data<sup>30</sup> appeared to produce more results as there were  
650 considerably more participants and digital measure samples (315 and  
651 approximately 25985, respectively) SPE was not designed as a long-term study and  
652 has concluded. There remains an opportunity to resume SHC 2.0 and compare data  
653 collected during the pandemic to post-pandemic data. Overall, the SHC 2.0 study  
654 identified some measures of lifestyle that appear to be associated with measures of  
655 mental health in undergraduate students.

#### 656 **Acknowledgements**

657 C.B. thanks Dr. Kevin Shoemaker for initial involvement in Smart Healthy Campus,  
658 and Ms. Arlene Fleischhauer for support of that work. C.B. thanks Dr. Lorie Donelle  
659 for suggestions to the EMAX software that were incorporated into the SHC 2.0 app.  
660 C.B. also thanks Dr. Eva Pila and MacLean Press for contributions to the SHC 2.0  
661 study and app.

#### 662 **Contributorship**

663 The authors provided have the entire authorship of this article.

#### 664 **Declaration of conflicting interests**

665 None declared.

666 **Funding**

667 Study incentives were funded by FIMS, Western University, Canada.

668 **Ethical approval**

669 Ethics approval was provided by Western University's Health Sciences Research

670 Ethics Board (HSREB) in October 2020 (Project ID 116670).

671 **Informed consent**

672 Consent was obtained from all research participants prior to the commencement of

673 the research.

674 **Supplemental material**

675 Supplemental material for this article is available online.

676 **Abbreviations**

677 CPU: Central Processing Unit

678 EMA: Ecological Momentary Assessment

679 EMAX1: Ecological Momentary Assessment eXtensions 1st edition software

680 EMAX2: Ecological Momentary Assessment eXtensions 2nd edition software

681 SHC: Smart Healthy Campus

682 SHCv2: Smart Healthy Campus Version 2 study

683 SPE: Student Pandemic Experience

684

685 **References**

- 686 1. Fried RR, Karmali S, Irwin JD, et al. Making the grade: Mentors' perspectives of  
687 a course-based, smart, healthy campus pilot project for building mental health  
688 resiliency through mentorship and physical activity. *Int J Evid Based Coach*  
689 *Mentor* 2018; 16: 84–98.
- 690 2. Council of Ontario Universities. *In It Together: Taking Action on Student*  
691 *Mental Health*, [https://cou.ca/wp-content/uploads/2017/11/In-It-Together-](https://cou.ca/wp-content/uploads/2017/11/In-It-Together-PSE-Mental-Health-Action-Plan.pdf)  
692 [PSE-Mental-Health-Action-Plan.pdf](https://cou.ca/wp-content/uploads/2017/11/In-It-Together-PSE-Mental-Health-Action-Plan.pdf) (2017).
- 693 3. Doreleyers A, Knighton T. COVID-19 Pandemic: Academic Impacts on  
694 Postsecondary Students in Canada. StatCan COVID-19: Data to Insights for a  
695 Better Canada. *Stat Canada*.
- 696 4. Wall K. COVID-19 Pandemic: financial impacts on postsecondary students in  
697 Canada. *Stat Canada*.
- 698 5. Hicks LJ, Caron EE, Smilek D. SARS-CoV-2 and Learning : The Impact of a  
699 Global Pandemic on Undergraduate Learning Experiences. *Scholarsh Teach*  
700 *Learn Psychol*.
- 701 6. Tasso AF, Hisli Sahin N, San Roman GJ. COVID-19 disruption on college  
702 students: Academic and socioemotional implications. *Psychol Trauma Theory,*  
703 *Res Pract Policy*. Epub ahead of print 2021. DOI: 10.1037/tra0000996.
- 704 7. Prati G, Mancini AD. The psychological impact of COVID-19 pandemic  
705 lockdowns: A review and meta-analysis of longitudinal studies and natural  
706 experiments. *Psychological Medicine*. Epub ahead of print 2021. DOI:  
707 10.1017/S0033291721000015.

- 708 8. Adlaf EM, Gliksman L, Demers A, et al. The prevalence of elevated  
709 psychological distress among canadian undergraduates: Findings from the  
710 1998 Canadian campus survey. *J Am Coll Health Assoc*. Epub ahead of print  
711 2001. DOI: 10.1080/07448480109596009.
- 712 9. Academic and Mental Health Needs of Students on a Canadian Campus. *Can J*  
713 *Couns Psychother / Rev Can Couns psychothérapie*.
- 714 10. Giamos D, Lee AYS, Suleiman A, et al. Understanding Campus Culture and  
715 Student Coping Strategies for Mental Health Issues in Five Canadian Colleges  
716 and Universities. *Can J High Educ*. Epub ahead of print 2017. DOI:  
717 10.7202/1043242ar.
- 718 11. Wang R, Chen F, Chen Z, et al. Studentlife: Assessing mental health, academic  
719 performance and behavioral trends of college students using smartphones. In:  
720 *UbiComp 2014 - Proceedings of the 2014 ACM International Joint Conference on*  
721 *Pervasive and Ubiquitous Computing*. 2014. Epub ahead of print 2014. DOI:  
722 10.1145/2632048.2632054.
- 723 12. Brogly C, Lizotte DJ, Bauer MA. Ecological Momentary Assessment eXtensions  
724 3 (EMAX3) Proposal: An App for EMA-Type Research. In: *2021 Symposium on*  
725 *Computers and Communications (ISCC): 26th IEEE Symposium on Computers*  
726 *and Communications - Workshop on ICT Solutions for eHealth (ICTS4eHealth)*  
727 *(ICTS4eHealth2021)*. Athens, Greece, 2021.
- 728 13. Brogly C, Shoemaker JK, Lizotte DJ, et al. A Mobile App to Identify Lifestyle  
729 Indicators Related to Undergraduate Mental Health (Smart Healthy Campus):  
730 Observational App-Based Ecological Momentary Assessment. *JMIR Form Res*.

- 731 Epub ahead of print 2021. DOI: 10.2196/29160.
- 732 14. Brogly C, Bauer MA, Lizotte DJ, et al. An app-based surveillance system for  
733 undergraduate students' mental health during the covid-19 pandemic:  
734 Protocol for a prospective cohort study. *JMIR Res Protoc*. Epub ahead of print  
735 2021. DOI: 10.2196/30504.
- 736 15. Mohr DC, Zhang M, Schueller SM. Personal Sensing: Understanding Mental  
737 Health Using Ubiquitous Sensors and Machine Learning. *Annu Rev Clin*  
738 *Psychol*. Epub ahead of print 2017. DOI: 10.1146/annurev-clinpsy-032816-  
739 044949.
- 740 16. Tugade MM, Fredrickson BL. Resilient Individuals Use Positive Emotions to  
741 Bounce Back From Negative Emotional Experiences. *Journal of Personality and*  
742 *Social Psychology*. Epub ahead of print 2004. DOI: 10.1037/0022-  
743 3514.86.2.320.
- 744 17. Inglehart, R., C. Haerpfer, A. Moreno, C. Welzel, K. Kizilova, J. Diez-Medrano, M.  
745 Lagos, P. Norris EP& BP et al. (eds. . World Values Survey: All Rounds -  
746 Country-Pooled Datafile Version:  
747 <http://www.worldvaluessurvey.org/WVSDocumentationWVL.jsp>. Madrid: JD  
748 Systems Institute. *World Values Survey: All Rounds - Country-Pooled Datafile*.
- 749 18. Berwick DM, Murphy JM, Goldman PA, et al. Performance of a five-item mental  
750 health screening test. *Med Care*. Epub ahead of print 1991. DOI:  
751 10.1097/00005650-199102000-00008.
- 752 19. Smith BW, Dalen J, Wiggins K, et al. The brief resilience scale: Assessing the  
753 ability to bounce back. *Int J Behav Med*. Epub ahead of print 2008. DOI:

- 754 10.1080/10705500802222972.
- 755 20. Spitzer RL, Kroenke K, Williams JBW, et al. A brief measure for assessing  
756 generalized anxiety disorder: The GAD-7. *Arch Intern Med*. Epub ahead of  
757 print 2006. DOI: 10.1001/archinte.166.10.1092.
- 758 21. Henry JD, Crawford JR. The short-form version of the Depression anxiety  
759 stress scales (DASS-21): Construct validity and normative data in a large non-  
760 clinical sample. *Br J Clin Psychol*. Epub ahead of print 2005. DOI:  
761 10.1348/014466505X29657.
- 762 22. Mashek D, Cannaday LW, Tangney JP. Inclusion of community in self scale: A  
763 single-item pictorial measure of community connectedness. *J Community  
764 Psychol*. Epub ahead of print 2007. DOI: 10.1002/jcop.20146.
- 765 23. Milton K, Bull FC, Bauman A. Reliability and validity testing of a single-item  
766 physical activity measure. *Br J Sports Med*. Epub ahead of print 2011. DOI:  
767 10.1136/bjism.2009.068395.
- 768 24. Ostroff JS, Woolverton KS, Berry C, et al. Use of the Mental Health Inventory  
769 with adolescents: A secondary analysis of the Rand Health Insurance Study.  
770 *Psychol Assess*. Epub ahead of print 1996. DOI: 10.1037/1040-3590.8.1.105.
- 771 25. Heubeck BG, Neill JT. Confirmatory factor analysis and reliability of the mental  
772 health inventory for Australian adolescents. *Psychol Rep*. Epub ahead of print  
773 2000. DOI: 10.2466/pr0.2000.87.2.431.
- 774 26. Sun S, Folarin AA, Ranjan Y, et al. Using smartphones and wearable devices to  
775 monitor behavioral changes during COVID-19. *J Med Internet Res*. Epub ahead  
776 of print 2020. DOI: 10.2196/19992.

- 777 27. Kuznetsova A, Brockhoff PB, Christensen RHB. lmerTest Package: Tests in  
778 Linear Mixed Effects Models . *J Stat Softw*. Epub ahead of print 2017. DOI:  
779 10.18637/jss.v082.i13.
- 780 28. Huckins JF, da Silva AW, Wang W, et al. Mental health and behavior of college  
781 students during the early phases of the COVID-19 pandemic: Longitudinal  
782 smartphone and ecological momentary assessment study. *J Med Internet Res*.  
783 Epub ahead of print 2020. DOI: 10.2196/20185.
- 784 29. Mack DL, DaSilva AW, Rogers C, et al. Mental health and behavior of college  
785 students during the covid-19 pandemic: Longitudinal mobile smartphone and  
786 ecological momentary assessment study, part II. *J Med Internet Res*. Epub  
787 ahead of print 2021. DOI: 10.2196/28892.
- 788 30. Brogly C. *Observations of positive mental health indicators in undergraduates*  
789 *using specialized mobile apps during the COVID-19 pandemic*. Western  
790 University, <https://ir.lib.uwo.ca/etd/8532> (2022).  
791
